# Supplementary material
Source: PubMed Central journal article supplement (PMC4302832)
Supplement: bi501380t_si_001.pdf [file bi501380t_si_001.pdf]

Supplement for:

Intramolecular N-glycan/polypeptide interactions  
observed at multiple N-glycan remodeling steps through  
[<sup>13</sup>C, <sup>15</sup>N]-*N*-acetylglucosamine labeling of  
immunoglobulin G1

Adam W. Barb\*

Roy J. Carver Department of Biochemistry, Biophysics and Molecular Biology

Iowa State University, Ames, IA 50011

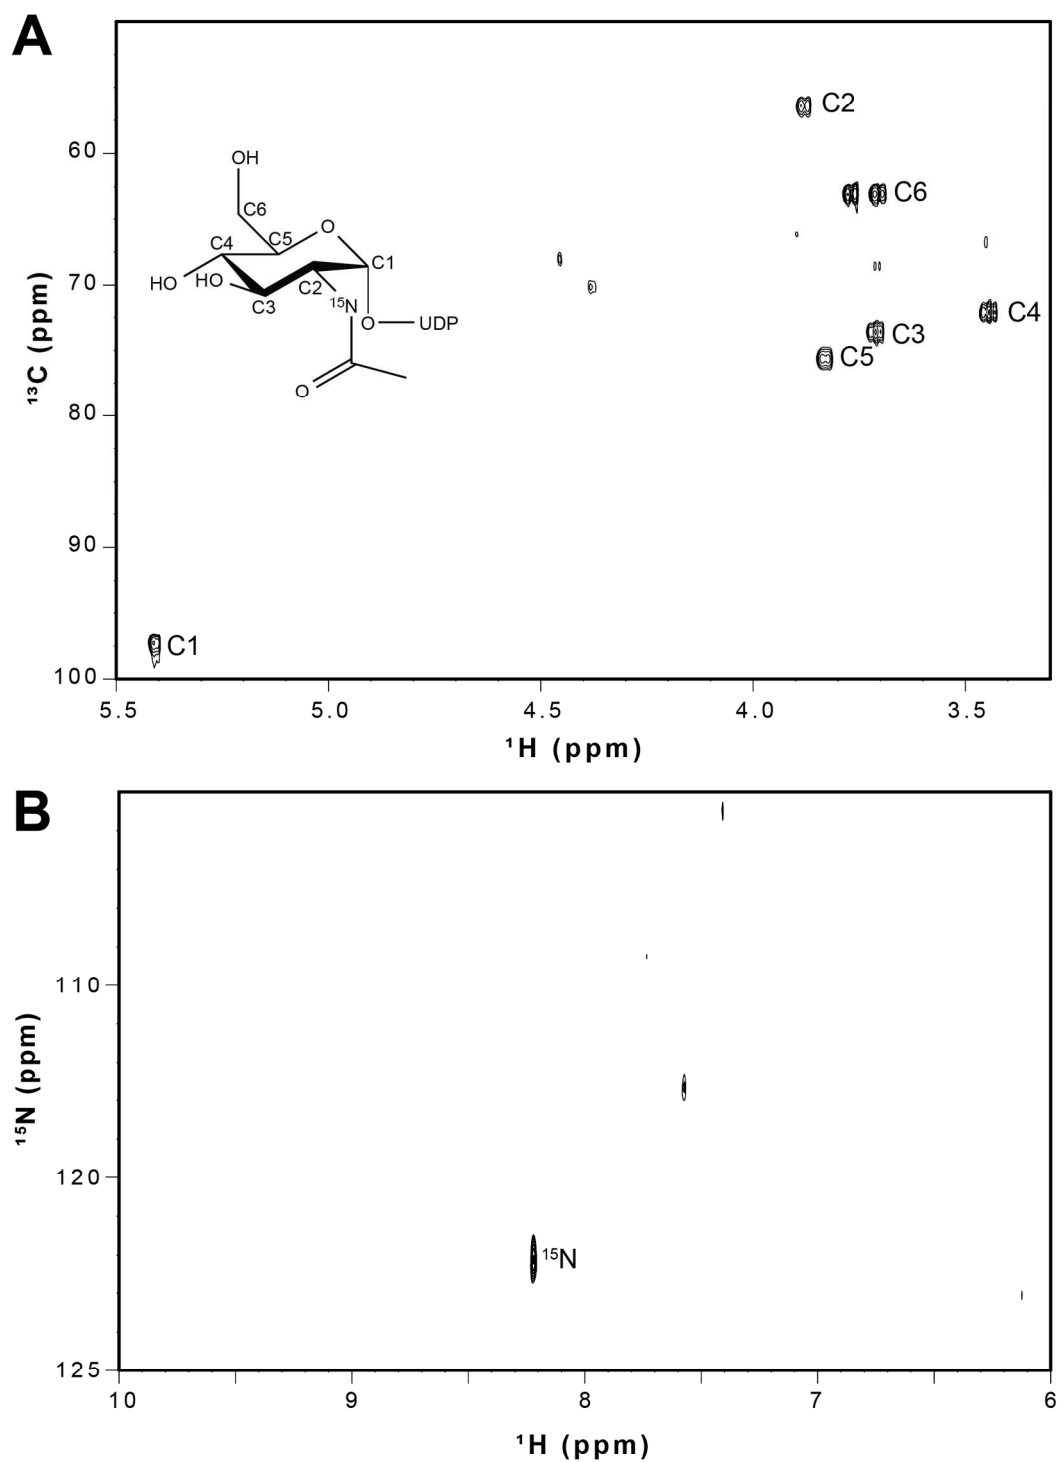

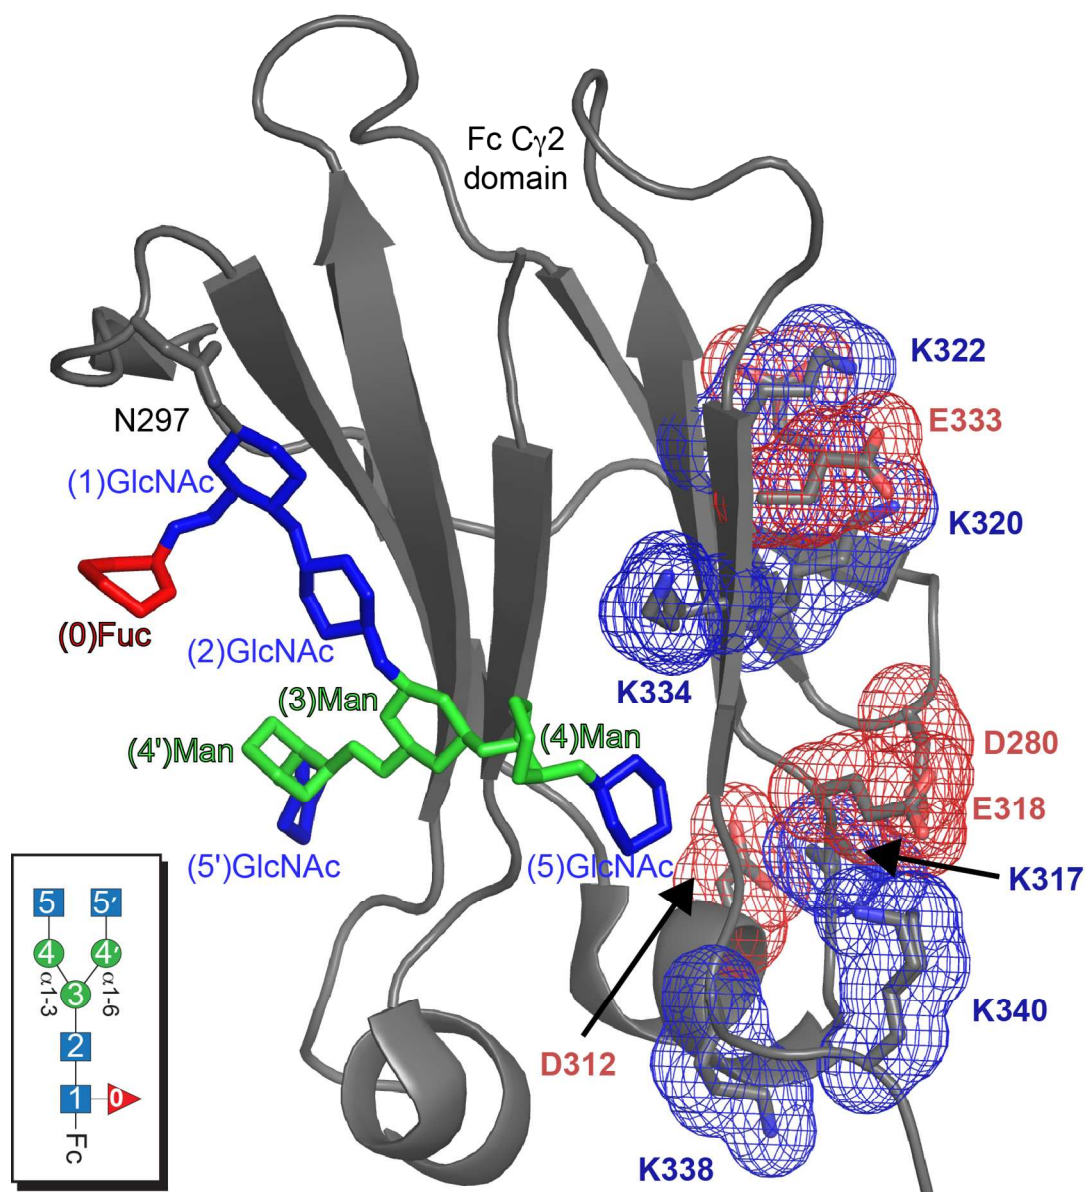

**Figure S2.** Basic lysine residues are poised to influence the resonance frequency of atoms of the (5)GlcNAc residue. K334 is  $\sim 8$  Å from the (5)GlcNAc and despite the appearance in the figure, D312 is  $\sim 25$  Å away. Carbohydrate residues are colored according to Fig 1. This figure was created using pdb 4ku1<sup>1</sup> and PyMol (Schrödinger).

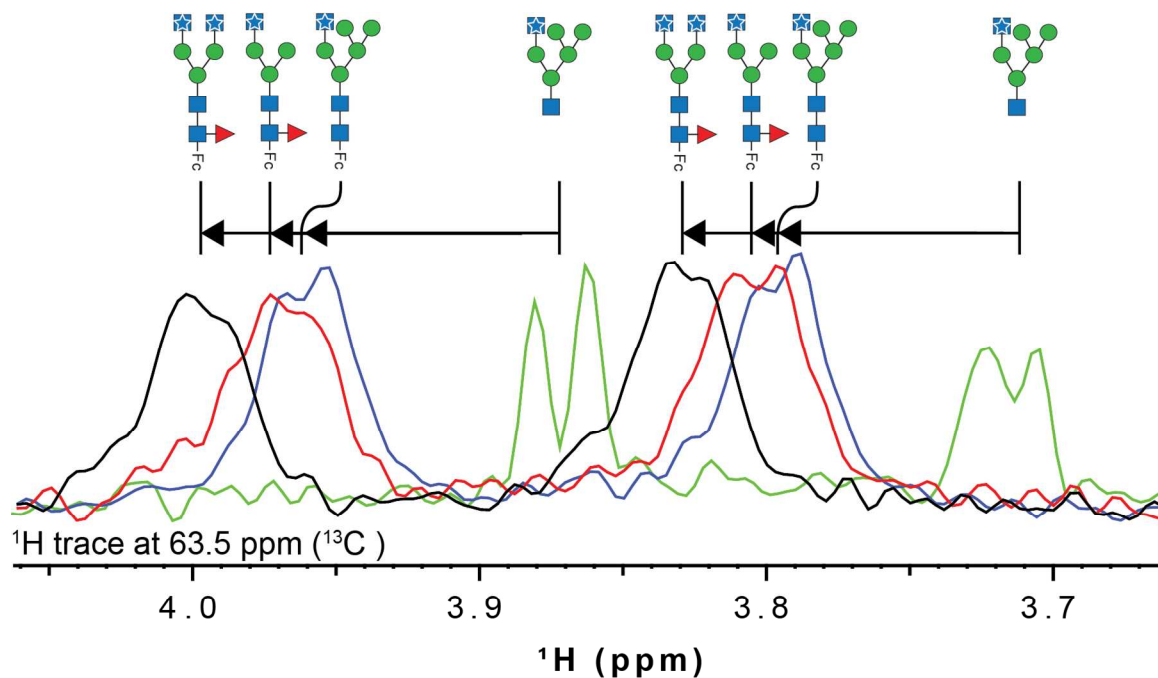

**Figure S3.** Representative lineshapes and peak positions from (5)-GlcNAc H6 peaks extracted from the same data shown in Figures 5&6, except these spectra were processed without applying a line-broadening window function in the  $^1\text{H}$  dimension. Spectra are colored according to the convention adopted in Figures 5-7. Note the clearly resolved  $^2J_{\text{HH}}$  couplings in the EndoF1 treated spectra (green lines).

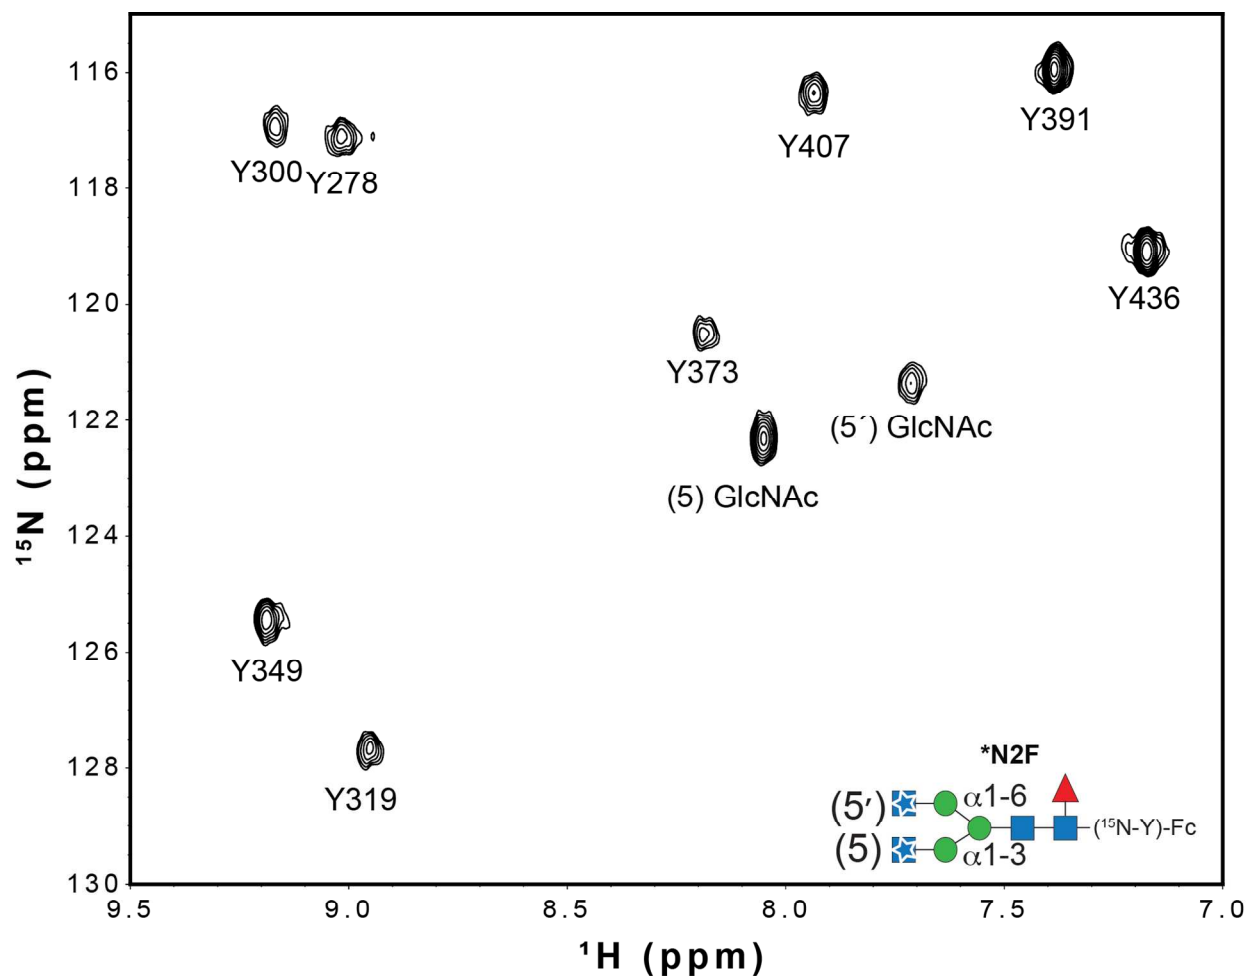

**Figure S4.**  $^1\text{H}$ - $^{15}\text{N}$ -HSQC-TROSY showing selective amino acid and carbohydrate amide resonances. ( $^{15}\text{N}$ -Y)-IgG1 Fc was remodeled to the \*N2F with [ $^{13}\text{C}$ ,  $^{15}\text{N}$ ]-GlcNAc. Resonances were assigned based on <sup>2</sup> and <sup>3</sup>.

### Supplemental References

- (1) Frank, M.; Walker, R. C.; Lanzilotta, W. N.; Prestegard, J. H.; Barb, A. W. *Journal of molecular biology* **2014**, 426, 1799.
- (2) Matsumiya, S.; Yamaguchi, Y.; Saito, J.; Nagano, M.; Sasakawa, H.; Otaki, S.; Satoh, M.; Shitara, K.; Kato, K. *Journal of molecular biology* **2007**, 368, 767.
- (3) Yamaguchi, Y.; Walchli, M.; Nagano, M.; Kato, K. *Carbohydrate research* **2009**, 344, 535.
